# Supplementary material for: Immobilization of laccase on magnetic cellulose beads for enhanced biodegradation of bisphenol A and a metal-complex dye
Source: Research Square preprint supplement (doi:10.21203/rs.3.rs-8013262/v1), 2026-01-08
Supplement: Supplementary file 1 [file d8f5f0e8f6b530072ab0f71d.docx]

**Immobilization of laccase on magnetic cellulose beads for enhanced biodegradation of bisphenol A and a metal-complex dye**

**Gulay Bayramoglu*1,2, and Mehmet Yakup Arica1**

1Biochemical Processing and Biomaterial Research Laboratory, Gazi University, 06500 Teknikokullar, Ankara, Turkey

2Department of Chemistry, Faculty of Sciences, Gazi University, 06500 Teknikokullar, Ankara, Turkey

**Correspondence authors:**

*Email: [g_bayramoglu@hotmail.com](mailto:g_bayramoglu@hotmail.com)


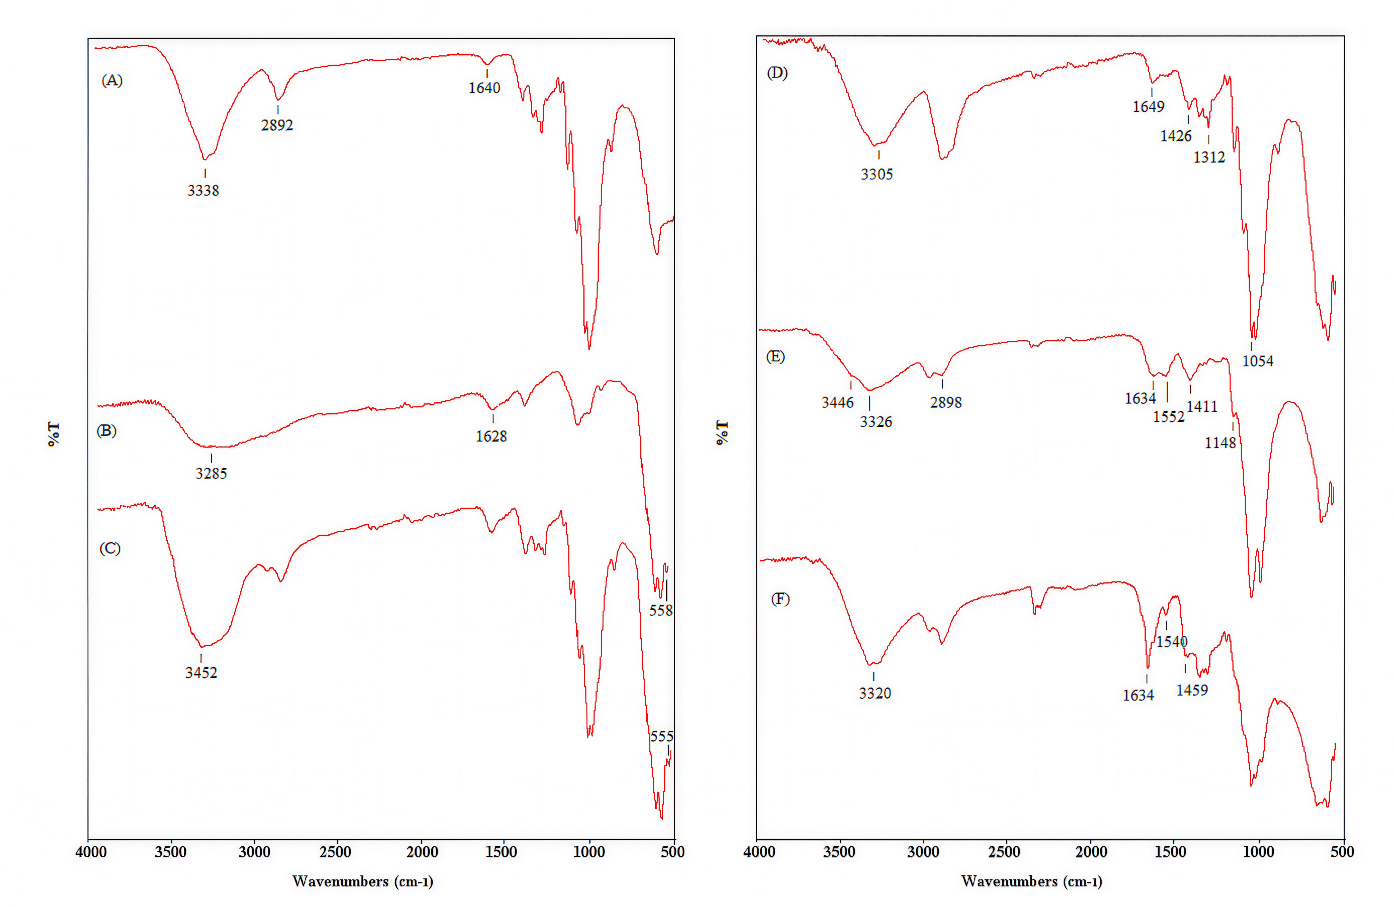


**Figure S1.** FTIR spectra of pure cellulose (A), magnetic particles (B), MCB (C), MCB@PDA-HMDA (D), MCB@PDA-HMDA-Cu(II)-Lac, and MCB@PDA-HMDA-GA-Lac


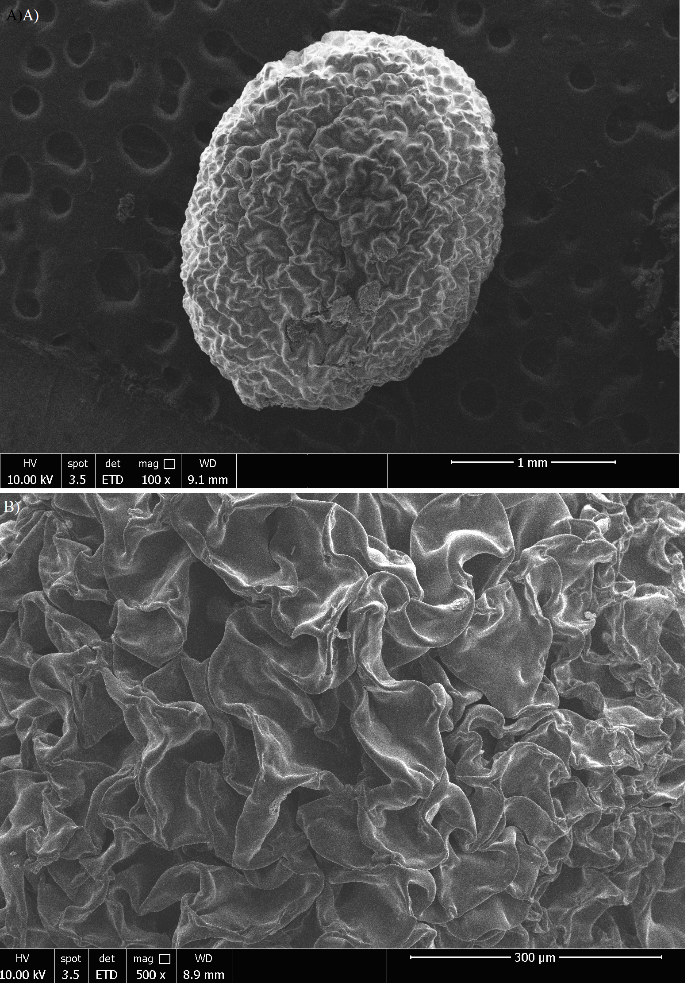


**Figure S2.** SEM image of the MCB@PDA-HMDA beads (A), and surface structure of the MCB@PDA-HMDA beads (B)


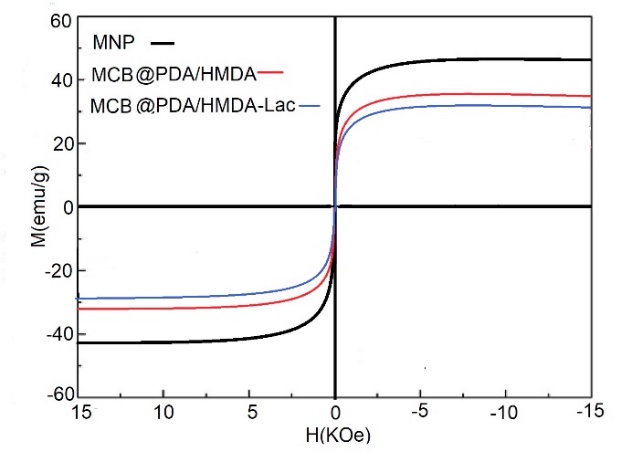


**Figure S3.** The magnetization curves of the MNP, MCB@PDA-HMDA, and MCB@PDA-HMDA-Lac beads at room temperature


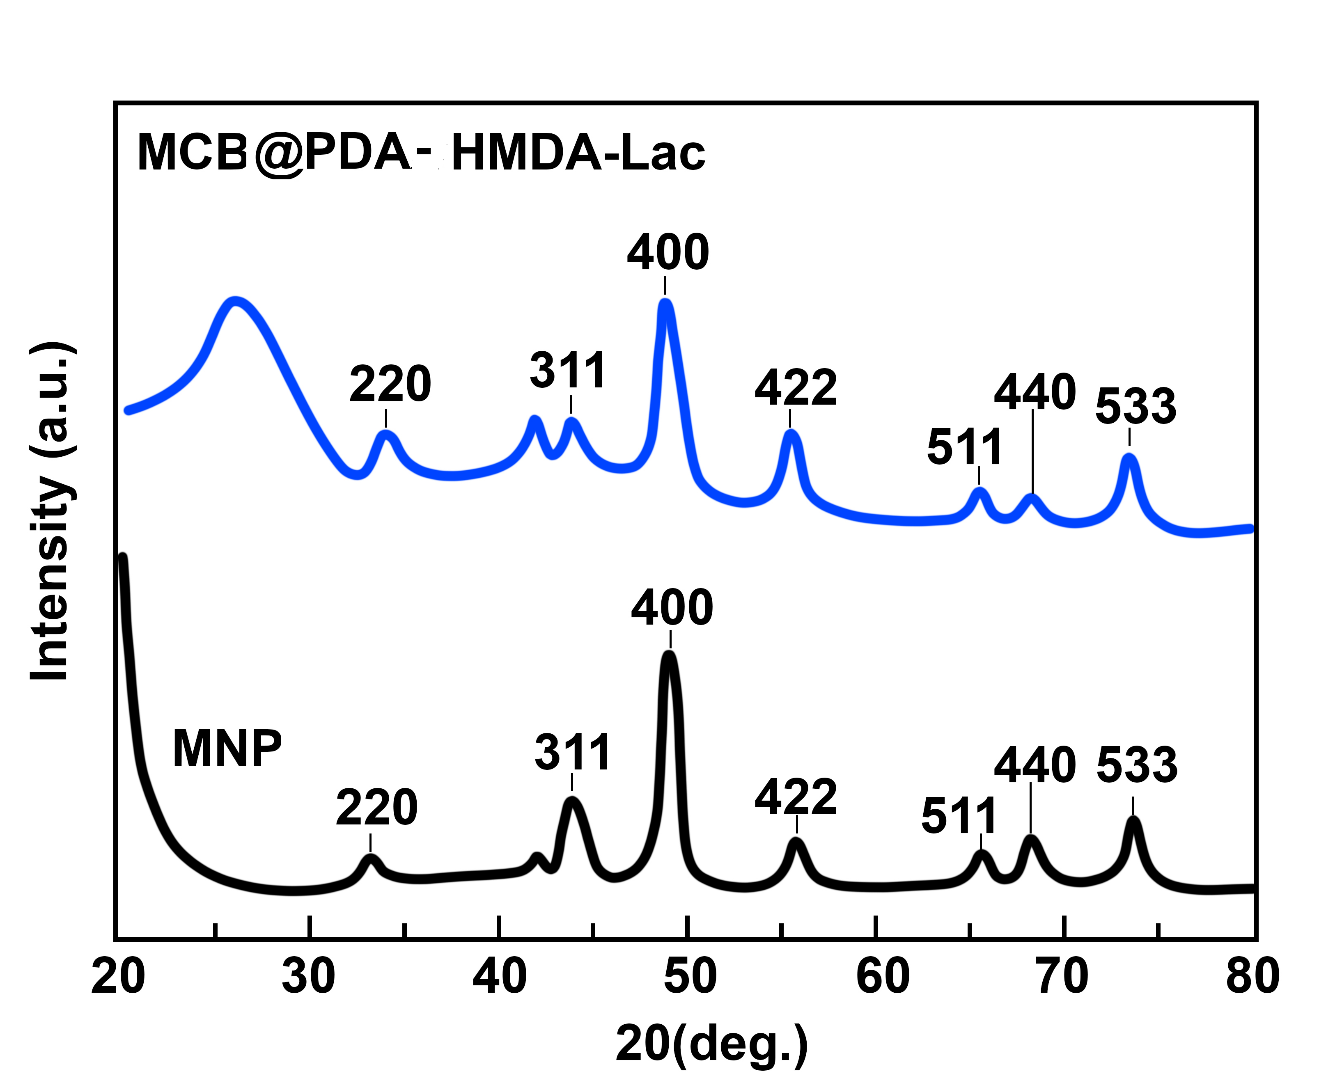


**Figure S4.** XRD patterns of Fe3O4 (MNPs) and MCB@PDA-HMDA-GA-Lac beads


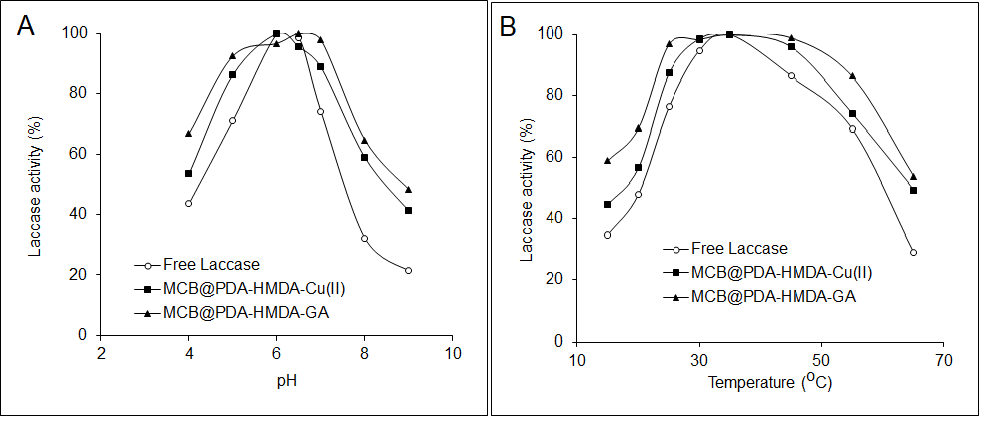


**Figure S5.** Effect of pH on the activity of laccase preparations (A), Effect of temperature on the activity of laccase preparations (B)

**
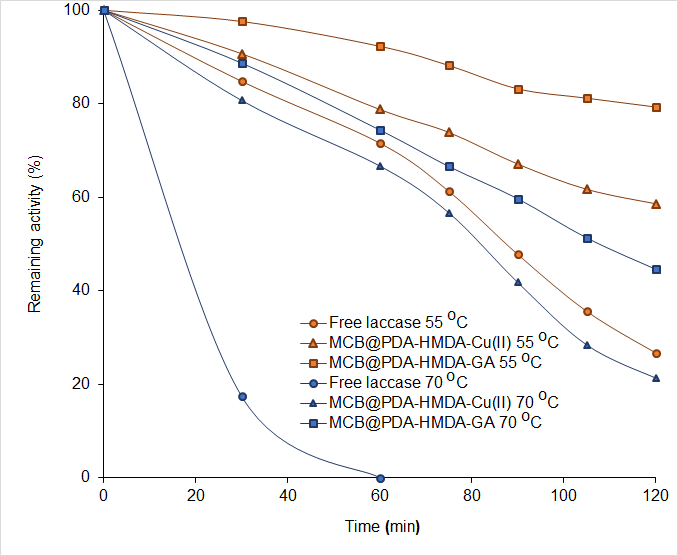
**

**Figure S6.** Thermal stabilities ofMCB@PDA-HMDA-GA-Lac and MCB@PDA-HMDA-Cu(II)-Lac at two different temperatures.

**Table S1.** Growth inhibition test of *C. vulgaris* grown with three different initial concentrations of BPA, and RG-5 (i.e., 5, 10, and 25 mg/L)

|  | Initial concentration of chemicals (mg/L) | Biomass dry weight (mg/L) | Biomass recovery  (%) |
| --- | --- | --- | --- |
| Control | 0 | 0.817±0.037 | 100 |
| BPA | 5 | 0.795±0.026 | 97 |
|  | 10 | 0.568±0.039 | 69 |
|  | 25 | 0.358±0.053 | 43 |
| RG-5 | 5 | 0.693±0.024 | 85 |
|  | 10 | 0.275±0.057 | 34 |
|  | 25 | 0.173±0.043 | 21 |
| DP - BPA | 25 | 0.834±0.065 | 102 |
| DP - RG-5 | 25 | 0.196±0.048 | 23 |

DP: Degradation product was obtained after 120 treatments with MCB@PDA-HMDA-Cu(II)-Lac preparation
